# Supplementary material for: A New Method to Evaluate Lower Esophageal Distension Capacity in Eosinophilic Esophagitis by Using Functional Lumen Imaging Probe (EndoFLIP™)
Source: MDPI journal article supplement (doi:10.3390/diagnostics14020218), 2024-01-19
Supplement: s1 [file s1]

**Table S1:** Esophageal diameters at maximal volume distension and esophageal dynamics in healthy control subjects with normal esophagus, as determined with Endoflip™

| Subject | Diameter [mm] | Max Pressure [mmHg] | Max Volume [mL] | Contractions | Antegrade |
|---------|---------------|---------------------|-----------------|--------------|-----------|
| C1      | 17.396        | 38.85               | 60              | yes          | Yes       |
| C2      | 17.667        | 44.72               | 50              | yes          | Yes       |
| C3      | 17.098        | 42.5                | 60              | yes          | Yes       |
| C4      | 16.767        | 36.1                | 60              | yes          | Yes       |
| C5      | 18.691        | 34.49               | 60              | yes          | No        |
| C6      | 16.983        | 64.66               | 60              | yes          | Yes       |
| C7      | 16.496        | 59.57               | 60              | yes          | Yes       |
| C8      | 19.909        | 49.17               | 50              | yes          | Yes       |
| C9      | 16.549        | 48.83               | 55              | yes          | Yes       |
| C10     | 13.312        | 51.05               | 60              | yes          | Yes       |

**Table S2:** Esophageal diameters at maximal volume distension and esophageal dynamics in patients with active EoE before treatment (BT) measured with Endoflip™

| Patient | Diameter [mm] | Max Pressure [mmHg] | Max Volume [mL] | Contractions | Antegrade |
|---------|---------------|---------------------|-----------------|--------------|-----------|
| P1BT    | 11.135        | 60.21               | 60              | no           | -         |
| P2BT    | 10.437        | 63.17               | 60              | no           | -         |
| P3BT    | 12.819        | 65.41               | 35              | yes          | yes       |
| P4BT    | 15.394        | 61.62               | 45              | yes          | yes       |
| P5BT    | 15.211        | 86.28               | 60              | yes          | yes       |
| P6BT    | 17.51         | 43.37               | 60              | yes          | yes       |
| P7BT    | 12.499        | 66.18               | 60              | no           | -         |
| P8BT    | 13.391        | 85.32               | 60              | no           | -         |
| P9BT    | 14.165        | 50.32               | 60              | yes          | yes       |
| P10BT   | 12.906        | 77.32               | 60              | no           | -         |
| P11BT   | 16.429        | 70.77               | 45              | yes          | yes       |
| P12BT   | 18.121        | 53.15               | 60              | yes          | yes       |
| P13BT   | 13.539        | 76.39               | 55              | yes          | yes       |
| P14BT   | 19.693        | 41.49               | 60              | yes          | yes       |

**Table S3:** Esophageal diameters at maximal volume distension and esophageal dynamics in patients with EoE in remission after treatment (AT) with budesonide, measured with Endoflip™

| Patient | Diameter [mm] | Max Pressure [mmHg] | Max Volume [mL] | Contractions | antegrade |
|---------|---------------|---------------------|-----------------|--------------|-----------|
| P1AT    | 15.473        | 58.59               | 60              | yes          | yes       |
| P2AT    | 13.398        | 81.82               | 60              | yes          | yes       |
| P3AT    | 15.093        | 68.99               | 45              | yes          | yes       |
| P4AT    | 16.69         | 64.26               | 60              | yes          | yes       |
| P5AT    | 15.416        | 65.45               | 60              | yes          | yes       |
| P6AT    | 17.353        | 54.16               | 60              | yes          | yes       |
| P7AT    | 14.868        | 67.92               | 55              | yes          | yes       |
| P8AT    | 15.225        | 69.09               | 60              | yes          | yes       |
| P9AT    | 18.855        | 52.84               | 60              | yes          | yes       |
| P10AT   | 14.68         | 52.12               | 60              | yes          | yes       |
| P11AT   | 18.128        | 54.02               | 60              | yes          | yes       |
| P12AT   | 19.833        | 22.04               | 60              | yes          | yes       |
| P13AT   | 14.546        | 52.9                | 60              | yes          | yes       |
| P14AT   | 17.58         | 39.45               | 60              | yes          | yes       |
